# Supplementary material
Source: PubMed Central journal article supplement (PMC3068612)
Supplement: NIHMS238479-supplement-List.pdf [file NIHMS238479-supplement-List.pdf]

## **AUTHORSHIP LIST FOR ADNI PUBLICATIONS**

The Data and Publications Committee, in keeping with the publication policies adopted by the ADNI Steering Committee, here provide lists for standardized authorship.

The list consists of two parts: Infrastructure Investigators and Site Investigators. Infrastructure Investigators will represent the names responsible for leadership and infrastructure. Site Investigators will represent the names of individuals at each recruiting site.

All papers, including methodological papers, should have an authorship list that consists of Infrastructure Investigators plus the FULL list.

## **Part A: Leadership and Infrastructure**

### **Principle Investigator**

Michael Weiner, MD UC San Francisco

### **ADCS PI and Director of Coordinating Center Clinical Core**

Leon Thal, MD UC San Diego

### **Executive Committee**

Michael Weiner, MD UC San Francisco  
Leon Thal, MD UC San Diego  
Ronald Petersen, MD, PhD Mayo Clinic, Rochester  
Clifford R. Jack, Jr., MD Mayo Clinic, Rochester  
William Jagust, MD UC Berkeley  
John Trojanowki, MD, PhD UPenn  
Arthur W. Toga, PhD UCLA  
Laurel Beckett, PhD UC Davis  
Robert C. Green, MD, MPH Boston University  
Anthony Gamst, PhD UC San Diego

### **Industry Scientific Advisory Board (iSAB)**

William Z. Potter, MD, PhD MERCK Research Laboratories (Chair)

### **Data and Publication Committee (DPC)**

Robert C. Green, MD, MPH Boston University (Chair)

### **Resource Allocation Review Committee**

Tom Montine, MD, PhD University of Washington (Chair)

### **Clinical Core Leaders**

Ronald Petersen, MD, PhD Mayo Clinic, Rochester (Core PI)  
Leon Thal, MD UC San Diego

### **MRI Core Leaders and Key Personnel**

Clifford R. Jack, Jr., MD Mayo Clinic, Rochester (Core PI)  
Dale Anders, PhD UC San Diego  
Matthew Bernstein, PhD Mayo Clinic, Rochester  
Joel Felmlee, PhD Mayo Clinic, Rochester  
Nick Fox, MD University of London  
Paul Thompson, PhD UCLA School of Medicine  
Norbert Schuff, PhD UCSF MRI  
Gene Alexander, PhD Banner Good Samaritan MRI Center

### **PET Core and Key Personnel**

William Jagust, MD UC Berkeley (Core PI)

Dan Bandy, MS, CNMT  
Robert A. Koeppe, PhD  
Norm Foster, MD  
Eric M. Reiman, MD  
Kewei Chen, PhD

Banner Health, AZ  
University of Michigan  
University of Utah  
Banner Good Samaritan PET Center  
Banner Good Samaritan PET Center

**Biomarkers Core Leader and Key Personnel**

John Trojanowki, MD, PhD      UPenn School of Medicine (Core PI)  
Les Shaw, PhD      UPenn School of Medicine  
Virginia M.-Y. Lee, PhD, MBA      UPenn School of Medicine  
Magdalena Korecka, PhD      UPenn School of Medicine

**Informatics Core Leader and Key Personnel**

Arthur W. Toga, PhD      UCLA (Core PI)  
Karen Crawford      UCLA  
Scott Neu, PhD      UCLA

**Biostatistics Core Leader and Key Personnel**

Laurel Beckett, PhD      UC Davis (Core PI)  
Danielle Harvey, PhD      UC Davis  
Anthony Gamst, PhD      UC San Diego (ADCS Statistics and Informatics Lead)  
John Kornak, PhD      UC Davis

**Early Project Development**

Zaven Kachaturian, PhD      Khachaturian, Radebaugh & Associates (KRA), Inc  
Alzheimer's Association's Ronald and Nancy Reagan's  
Research Institute  
Richard Frank, MD, PhD      General Electric  
Peter J. Snyder, PhD      University of Connecticut

**NIA**

Susan Molchan, PhD      National Institute on Aging/National Institutes of Health

## **Part B: Investigators By Site**

### FULL ADNI Investigator Lists (3 author maximum per site):

|                                       |                                                                                  |
|---------------------------------------|----------------------------------------------------------------------------------|
| Oregon Health and Science University: | Jeffrey Kaye, MD<br>Remi Vorobik, BA<br>Joseph Quinn, MD                         |
| University of Southern California:    | Lon Schneider, MD<br>Sonia Pawluczyk, MD<br>Bryan Spann, DO                      |
| University of California--San Diego:  | Adam S. Fleisher, MD<br>Helen Vanderswag, R.N.                                   |
| University of Michigan:               | Judith L. Heidebrink, MD, MS<br>Joanne L. Lord, LPN, BA, CCRC                    |
| Mayo Clinic, Rochester:               | Ronald Petersen, MD, PhD<br>Kris Johnson, RN                                     |
| Baylor College of Medicine:           | Rachelle S. Doody, MD, PhD<br>Javier Villanueva-Meyer, MD<br>Munir Chowdhury, MS |
| Columbia University Medical Center:   | Yaakov Stern, PhD<br>Lawrence S. Honig, MD, PhD<br>Karen L. Bell, MD             |
| Washington University, St. Louis:     | John C. Morris, MD<br>Mark A. Mintun, MD<br>Stacy Schneider APRN, BC, GNP        |
| University of Alabama - Birmingham:   | Daniel Marson, JD, PhD<br>Randall Griffith, PhD<br>Beverly Badger, RN            |
| Mount Sinai School of Medicine:       | Hillel Grossman, MD<br>Cheuk Tang, PhD<br>Jessica Stern, BA                      |
| Rush University Medical Center:       | Leyla deToledo-Morrell, PhD<br>Raj C. Shah, MD<br>Julie Bach, MSW, MSG           |
| Wein Center:                          | Ranjan Duara, MD<br>Richard Isaacson, MD<br>Silvia Strauman, PhD                 |
| Johns Hopkins University:             | Marilyn S. Albert, PhD<br>Julia Pedroso, MA<br>Jaimie Toroney, BA                |
| New York University:                  | Henry Rusinek, PhD<br>Mony J de Leon, EdD<br>Susan M De Santi, PhD               |
| Duke University Medical Center:       | P. Murali Doraiswamy, MD<br>Jeffrey R. Petrella, MD<br>Marilyn Aiello BS         |
| University of Pennsylvania:           | Christopher M. Clark, MD                                                         |

|                                                  |                                                                                                        |
|--------------------------------------------------|--------------------------------------------------------------------------------------------------------|
| University of Kentucky:                          | Cassie Pham, BS<br>Jessica Nunez<br>Charles D. Smith, MD<br>Curtis A. Given II, MD<br>Peter Hardy, PhD |
| University of Pittsburgh:                        | Steven T. DeKosky, MD<br>MaryAnn Oakley, MA<br>Donna M. Simpson, CRNP, MPH                             |
| University of Rochester Medical Center:          | M. Saleem Ismail, MD<br>Anton Porsteinsson, MD<br>Colleen McCallum, MSW                                |
| University of California, Irvine:                | Steven C. Cramer, MD<br>Ruth A. Mulnard, RN, DNSc<br>Catherine McAdams-Ortiz, RN, MSN,<br>GNP          |
| University of Texas Southwestern Medical School: | Ramon Diaz-Arrastia, MD, PhD<br>Kristen Martin-Cook, MA<br>Michael DeVous, PhD                         |
| Emory University:                                | Allan I. Levey, MD, PhD<br>James J. Lah, MD, PhD<br>Janet S. Cellar, RN, MSN                           |
| University of Kansas, Medical Center:            | Jeffrey M. Burns, MD<br>Heather S. Anderson, MD<br>Mary M. Laubinger, MPA, BSN                         |
| University of California, Los Angeles:           | George Bartzokis, MD<br>Daniel H.S. Silverman, MD, PhD<br>Po H. Lu, PsyD                               |
| Mayo Clinic, Jacksonville:                       | Rita Fletcher, RN, CCRC<br>Francine Parfitt, MS, CCRC<br>Heather Johnson, BA                           |
| Indiana University:                              | Martin Farlow, MD<br>Scott Herring, RN<br>Ann M. Hake, MD                                              |
| Yale University School of Medicine:              | Christopher H. van Dyck, MD<br>Martha G. MacAvoy, PhD<br>Laurel A. Bifano, BA                          |
| McGill Univ., Montreal-Jewish General Hospital:  | Howard Chertkow, MD<br>Howard Bergman, MD<br>Chris Hosein, M.Ed                                        |
| Sunnybrook Health Sciences, Ontario:             | Sandra Black, MD FRCP(C)<br>Simon Graham, PhD<br>Curtis Caldwell, PhD                                  |
| U.B.C. Clinic for AD & Related, B.C.:            | Howard Feldman, MD FRCP(C)<br>Michele Assaly, MA<br>Ging-Yuek R. Hsiung, MD FRCP(C) MSc                |
| Cognitive Neurology - St. Joseph's, Ontario:     | Andrew Kertesz, MD                                                                                     |

|                                                |                                |
|------------------------------------------------|--------------------------------|
| Univ. of Nevada School of Medicine, Las Vegas: | John Rogers, MD                |
| Northwestern University:                       | Dick Trost, PhD                |
|                                                | Charles Bernick, MD            |
|                                                | Darren Gitelman, MD            |
|                                                | Nancy Johnson, PhD             |
|                                                | Marsel Mesulam, MD             |
| Premiere Research Inst (Palm Beach Neurology): | Carl Sadowsky, MD              |
|                                                | Teresa Villena, MD             |
|                                                | Scott Mesner, PhD              |
| Georgetown University Medical Center:          | Paul S. Aisen, MD              |
|                                                | Kathleen B. Johnson, ANP       |
|                                                | Kelly E. Behan, B.A.           |
| Brigham and Women's Hospital:                  | Reisa A. Sperling, MD          |
|                                                | Dorene M. Rentz, PsyD          |
|                                                | Keith A. Johnson, MD           |
| Stanford University:                           | Allyson Rosen, PhD             |
|                                                | Jared Tinklenberg, MD          |
|                                                | Wes Ashford, MD, PhD           |
| Sun Health Research Institute:                 | Marwan Sabbagh, MD, FAAN, CCRI |
|                                                | Donald Connor, PhD, PhD        |
|                                                | Sanja Obradov, BA, CCRC        |
| Boston University:                             | Robert C. Green, MD, MPH       |
|                                                | Ron Killiany, PhD              |
|                                                | Alex Norbash, MD, MHCM         |
| Howard University:                             | Thomas O. Obisesan, MD, MPH    |
|                                                | Annapurni Jayam-Trouth, MD     |
|                                                | Paul Wang, PhD                 |
| Case Western Reserve University:               | Alexander P. Auchus, MD        |
|                                                | Juebin Huang, MD, PhD          |
|                                                | Robert P. Friedland, MD        |
| University of California, Davis - Sacramento:  | Charles DeCarli, MD            |
|                                                | Evan Fletcher, PhD             |
|                                                | Owen Carmichael, PhD           |
| Neurological Care of CNY:                      | Smita Kittur, MD               |
|                                                | Seema Mirje, MBBS              |
| University of Wisconsin:                       | Sterling C. Johnson, PhD       |
| Parkwood Hospital:                             | Michael Borrie, MD             |
|                                                | T-Y Lee, PhD                   |
| University of Wisconsin:                       | Sanjay Asthana, MD             |
|                                                | Cynthia M. Carlsson, MD        |
| University of California, Irvine - BIC:        | Steven G. Potkin, MD           |
|                                                | Diane Highum, MD               |
|                                                | Adrian Preda, MD               |
|                                                | Dana Nguyen, PhD               |
| Banner Alzheimer's Institute:                  | Pierre N. Tariot, MD           |
|                                                | Eric M. Reiman, MD             |

|                                                  |                                                                                                     |
|--------------------------------------------------|-----------------------------------------------------------------------------------------------------|
| Ohio State University:                           | Barry A. Hendin, MD<br>Douglas W. Scharre, MD<br>Maria Katakaki, MD, PhD<br>David Q. Beversdorf, MD |
| Albany Medical College:                          | Earl A. Zimmerman, MD<br>Dzintra Celmins, MD<br>Alice D. Brown, FNP                                 |
| Thomas Jefferson University:                     | Sam Gandy, MD, PhD, PhD<br>Marjorie E. Marenberg, MD<br>Barry W. Rovner, MD                         |
| Hartford Hosp, Olin Neuropsychiatry Rsch Center: | Godfrey Pearlson, MD<br>Karen Blank, MD<br>Karen Anderson, RN                                       |
| Dartmouth-Hitchcock Medical Center:              | Andrew J. Saykin, PsyD<br>Robert B. Santulli, MD<br>Nadia Pare, PhD                                 |
| Wake Forest University Health Sciences:          | Jeff D. Williamson, MD, MHS<br>Kaycee M. Sink, MD, MS                                               |
| Byrd Institute:                                  | Huntington Potter, MD<br>B. Ashok Raj, MD                                                           |
| Rhode Island Hospital:                           | Amy Giordano, MPH, CCRC<br>Brian R. Ott, MD<br>Chuang-Kuo Wu, MD, PhD                               |
| MD Clinical:                                     | Ronald Cohen, PhD<br>Kerri L. Wilks, MD, CPI<br>Beth E. Safirstein MD                               |
